# Supplementary material for: Comprehensive analysis of the autophagy-dependent ferroptosis-related gene FANCD2 in lung adenocarcinoma
Source: Springer Nature journal article supplement (doi:10.1186/s12885-022-09314-9), 2022-03-02
Supplement: MOESM1 [file 20185488]

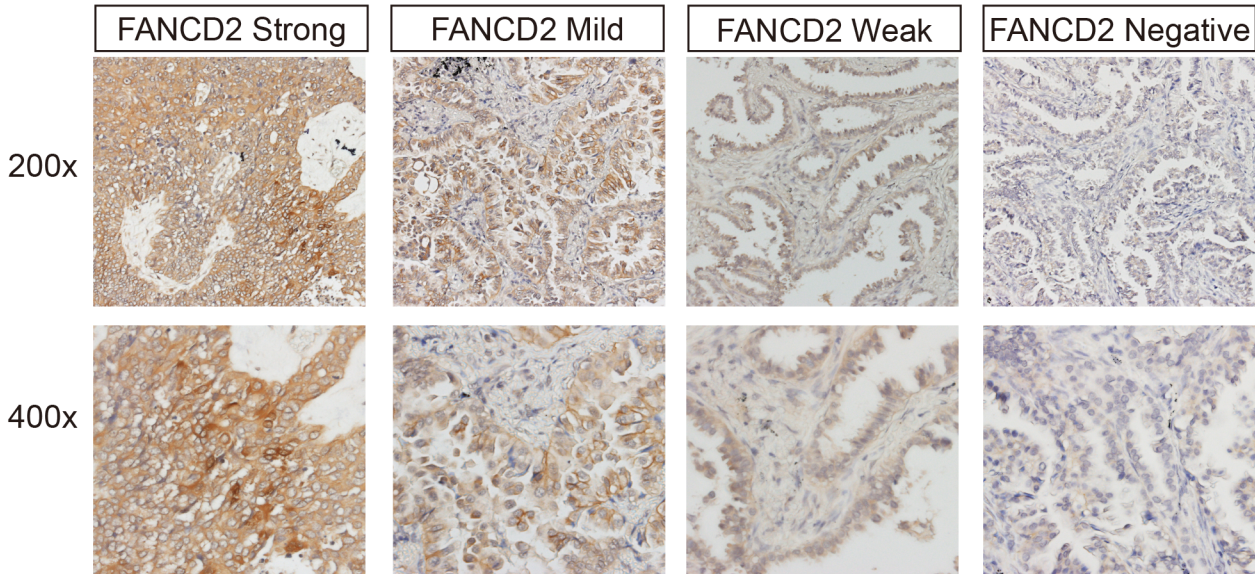

IHC staining in LUAD

**Supplementary Figure 1.** The immunohistochemistry score standards of FANCD2 in LUAD. 3, strong staining; 2, mild staining; 1, weak staining and 0, negative staining.
