# Supplementary material for: Comprehensive analysis of the autophagy-dependent ferroptosis-related gene FANCD2 in lung adenocarcinoma
Source: Springer Nature journal article supplement (doi:10.1186/s12885-022-09314-9), 2022-03-02
Supplement: MOESM2 [file 20185488]

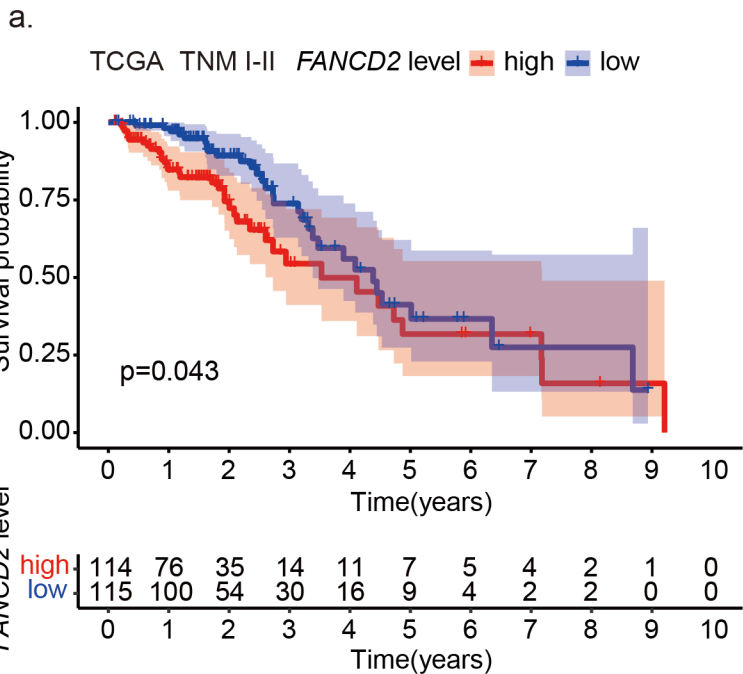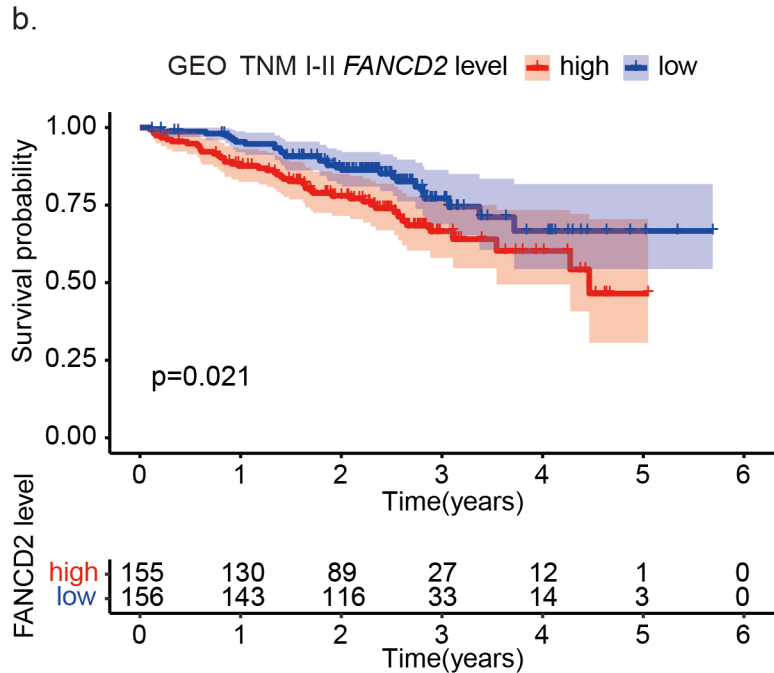

**Supplementary Figure 2.** Kaplan-Meier survival analysis of *FANCD2* in TCGA and GEO LUAD cohort in TNM I-II.

(a) The high expression of *FANCD2* is related to poor survival in the TNM I-II TCGA-LUAD cohort.

(b) The high expression of *FANCD2* is associated with poor survival in the TNM I-II GEO-LUAD cohort.
