# Supplementary material for: Comprehensive analysis of the autophagy-dependent ferroptosis-related gene FANCD2 in lung adenocarcinoma
Source: Springer Nature journal article supplement (doi:10.1186/s12885-022-09314-9), 2022-03-02
Supplement: MOESM3 [file 20185488]

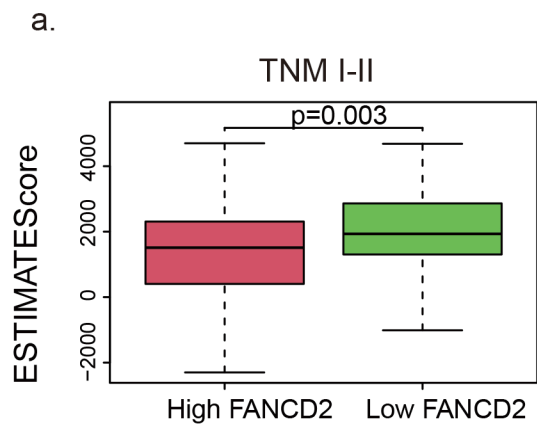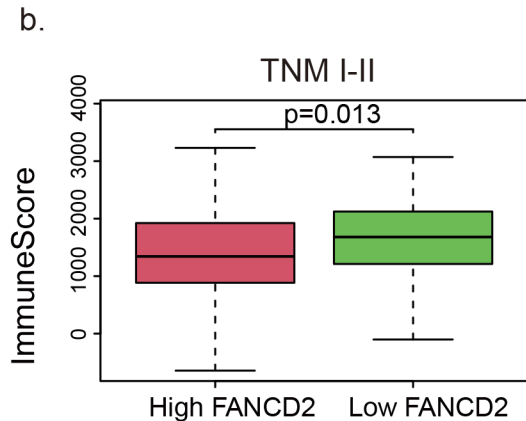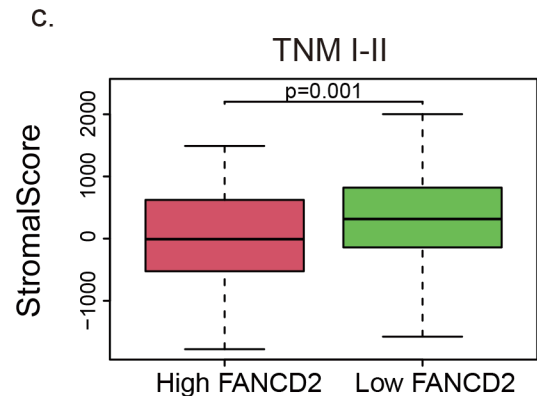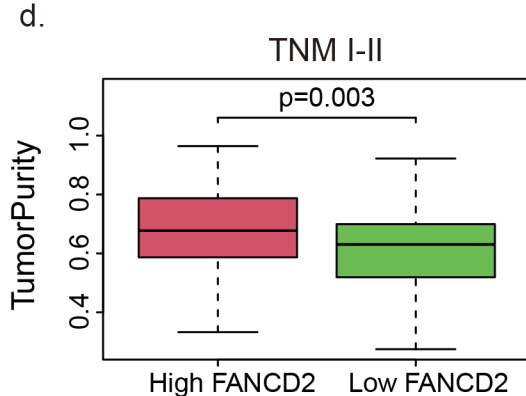

**Supplementary Figure 3.** The correlation between FANCD2 and ESTIMATE Score (a), Immune Score (b), Stromal Score (c), Tumor Purity (d) in TNM I-II stage TCGA LUAD cohort.
