# Supplementary material for: Comprehensive analysis of the autophagy-dependent ferroptosis-related gene FANCD2 in lung adenocarcinoma
Source: Springer Nature journal article supplement (doi:10.1186/s12885-022-09314-9), 2022-03-02
Supplement: MOESM5 [file 20185488]

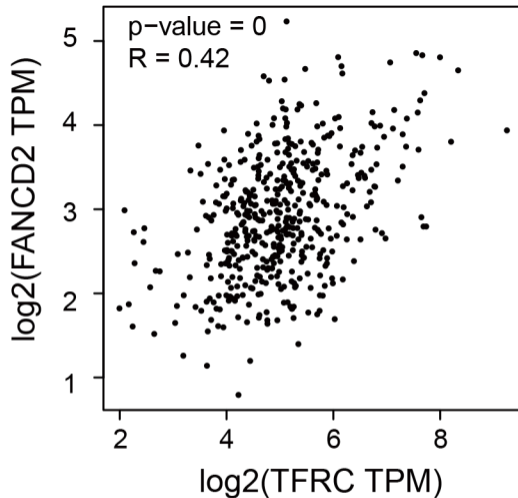

**Supplementary Figure 5.** The correlation analysis of FANCD2 with ferroptosis marker TFRC in GEPIA database.  
TFRC: transferrin receptor.
